# Supplementary material for: Epithelial cell senescence induces pulmonary fibrosis through Nanog-mediated fibroblast activation
Source: publisher site journal article supplement (doi:10.18632/aging.102613), 2019-12-31
Supplement: Supplementary file [file aging-v12i1-102613-supplementary-material-SD1.pdf]

## SUPPLEMENTARY FIGURE

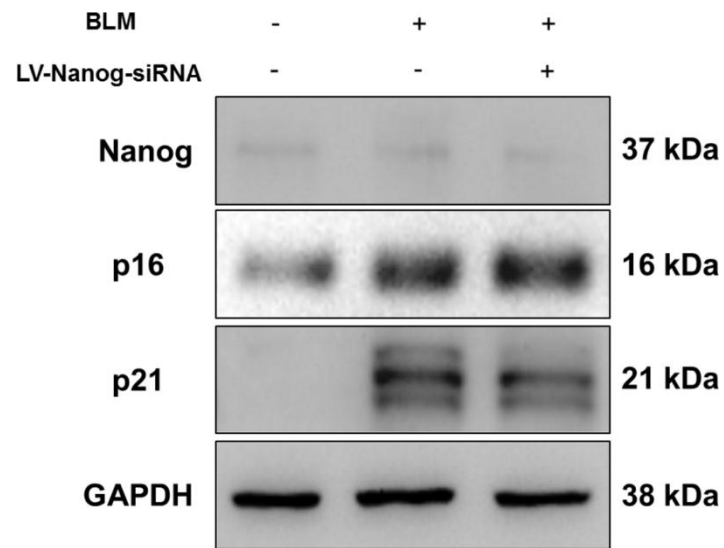

**Supplementary Figure 1. Inhibition Nanog has no effect on bleomycin (BLM)-induced epithelial cell senescence.** MLE-12 cells were transfected with LV-Nanog-siRNA in the presence or absence of BLM. The expression of Nanog, p16 and p21 were measured by Western blot.
