# Supplementary material for: Epithelial cell senescence induces pulmonary fibrosis through Nanog-mediated fibroblast activation
Source: publisher site journal article supplement (doi:10.18632/aging.102613), 2019-12-31
Supplement: Supplementary file [file aging-v12i1-102613-supplementary-material-SD2.pdf]

## SUPPLEMENTARY TABLE

Supplementary Table 1. RT-PCR primers.

| Gene names           | Sense                     | Antisense                 |
|----------------------|---------------------------|---------------------------|
| Human-p16            | AGGGCTTCCTGGACACGCTGGTGGT | CGGCATCTATGCGGGCATGGTTA   |
| Human-p21            | TGATTAGCAGCGGAACAAGGAGT   | TGGAGAAACGGGAACCAGGACAC   |
| Human-Rb1            | CTCAGATTCACCTTTATTTGAT    | CAGACAGAAGGCGTTCACAAAGT   |
| Human-Meis1          | GACCAGAAGAAGACAGAGCGGATGA | CGCCCGAGTCACTGAGCATAAAA   |
| Human-Meis2          | GTCTGCTCCTCCGACTCCTTCAA   | ATCGCACAGTTCGTGGACCTTTT   |
| Human-Nanog          | ACCTATGCCTGTGATTTGTGGG    | AGAAGTGGGTTGTTTGCCTTTG    |
| Human-GAPDH          | GAATGGGCAGCCGTTAGGAAAGC   | AGCATCACCCGGAGGAGAAATCG   |
| Mouse-Nanog          | CCTGATTCTTCTACCAGTCCCAAAC | CACAGTCCGCATCTTCTGCTTCC   |
| Mouse-IL1 $\beta$    | CAAGCAATACCCAAAGAAGAAGA   | ATTAGAAACAGTCCAGCCCATAC   |
| Mouse-IL-6           | GGAGCCCACCAAGAACGATAGTCAA | GTCACCAGCATCAGTCCCAAGAA   |
| Mouse-IL-8           | GGCTTTGCGTTGATTCTGGGAACT  | AGCGGTGTCCTGATTATCGTCCT   |
| Mouse-TNF- $\alpha$  | CATTTGAGGACGATAATCAGGAC   | AAAGCAGAAAGACTAAGCAGGAA   |
| Mouse- $\alpha$ -SMA | CCCAGATTATGTTTGAGACCTTC   | ATCTCCAGAGTCCAGCACATAAC   |
| Mouse-Oct4           | TCCCTCTGTTCCCGTCACTGCT    | GTCTACCTCCCTTGCTTGGCTC    |
| Mouse-Rex1           | AGGGAGAATGGTGCTCTGGGTCA   | TGTCATCGTCATCTATGCTTGTGGC |
| Mouse-Coll1a1        | CTTCTGGTCCTCGTGGTCTCCCT   | AAGCCTCGGTGTCCCTTCATTCC   |
| Mouse-GAPDH          | AGGTCGGTGTGAACGGATTTG     | TGTAGACCATGTAGTTGAGGTCA   |
